# Supplementary material
Source: HighWire-hosted journal article supplement (https://qdcxjkg.com/highwire/filestream/112810/field_highwire_adjunct_files/0/CME_34-1.pdf)

# CME Credit Application Form (1 CME credit)

To receive CME credits, read the CME article in this issue, indicate the correct responses to the educational questions below and complete the requested information overleaf in full. This form is also available in electronic format at [www.erj.ersjournals.com/current.dtl](http://www.erj.ersjournals.com/current.dtl). To return your application, you can either:

► use this form and return it completed to ERSJ Ltd, 442 Glossop Road, Sheffield, S10 2PX, UK; fax to +44 114 2665064; or e-mail to [info@ersj.org.uk](mailto:info@ersj.org.uk)

► fill in the online form at [www.erj.ersjournals.com/current.dtl](http://www.erj.ersjournals.com/current.dtl)

Certificates will be e-mailed to the address filled in overleaf. Please allow 4 weeks for processing.

There is now a charge for CME credit applications. For £30 you can make six attempts at the educational questions in issues of the *ERJ*. The charge will apply to each application, whether or not the CME credit is awarded. When you have paid, a reference number will be issued. Please enter your reference number in section 2 if you have already paid, or fill in your credit card details in section 3 if you have not paid. Note that your application for CME credits will not be processed until payment is received in full.

## 1. Educational questions. Answer by marking the correct answer.

### 1. Which of the following statements is true?

- Short sleep duration is associated with increased risk of obesity and diabetes.
- There is no biological effect of experimental sleep restriction.
- In the general population, sleep duration is not associated with any change in the hormones controlling appetite and body weight, *i.e.* leptin and ghrelin.
- Sleep effect on glucose metabolism is independent of obesity.

### 2. Which of the following statements is true?

- There is a link between obstructive sleep apnoea (OSA) and abnormal glucose control, demonstrated by cross-sectional studies.
- There is a link between OSA and abnormal glucose control, demonstrated by longitudinal studies.
- There is a causality relationship between OSA and abnormal glucose control.
- The relationship between OSA and abnormal glucose control is independent of obesity.

### 3. Which of the following statements is true?

- The prevalence of the metabolic syndrome does not differ in obese subjects whether apnoeic or not.
- There is no specific impact of OSA on lipid metabolism.
- Visceral obesity correlates with apnoea/hypopnoea index more closely than body mass index.
- Weight loss does not significantly impact on OSA severity.

### 4. In OSA, continuous positive airway pressure (CPAP) is usually not effective on:

- Blood pressure.
- Cholesterol.
- Insulin sensitivity in lean subjects.
- Insulin sensitivity in obese subjects.

### 5. Which of the following statements is true?

- C-reactive protein (CRP) is systematically increased in OSA patients.
- CRP is systematically reduced by CPAP treatment in OSA patients.
- OSA patients usually present with increase in leptin and leptin resistance.
- Glucose control, as assessed by HbA1c and continuous monitoring of interstitial glucose, is usually not improved in OSA patients.

Please turn the page and fill in your details

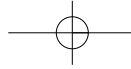

# CME Credit Application Form (continued)

## 2. Applicant personal details.

Reference No: ..... ERS Membership No. (if known): .....

Date of Birth (DD/MM/YYYY): .....

Family Name: ..... First Name: .....

Mailing Address: .....

.....

Postal Code: ..... City: ..... Country: .....

Telephone: + ..... E-mail: .....

## 3. Payment details.

I agree for payment of £30 (pounds sterling) to be taken from my credit card (MasterCard and Visa only). Details are as follows:

Card Type: MasterCard / Visa (please circle) ..... Cardholder Name: .....

Cardholder Number .....

Start date: ..... Expiry date: .....

\*CW2 No: ..... Signature: .....

Cardholder Address: .....

(if different from above address)

\*CW2 No: this is the number on the back of your card - without this number we are unable to process payments through the system

Unfortunately, we cannot accept payment by American Express. For payment enquiries, please speak to Joanne Abdy at the ERSJ Ltd Accounts Department: tel: +44 114 2672862; e-mail: joanne.abdy@ersj.org.uk

VAT No. 534 1778 39 Registered in England with Company Registration No. 2655805

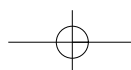

Supplement: CME_34-1.pdf [file CME_34-1.pdf]
